# Supplementary material
Source: PubMed Central journal article supplement (PMC3103305)
Supplement: supp_M110.200311_jbc.M110.200311-1.pdf [file supp_M110.200311_jbc.M110.200311-1.pdf]

## **Negative Regulation of STAT3-mediated Cellular Respiration by SirT1**

**Michel Bernier, Rajib K. Paul, Alejandro Martin-Montalvo, Morten Scheibye-Knudsen, Shaoming Song, Hua-Jun He, Sean M. Armour, Vilhelm A. Bohr, Lili Wang, Yaping Zong, David A. Sinclair, Rafael de Cabo**

|                               |               |
|-------------------------------|---------------|
| <b>Supplemental Figure 1.</b> | <b>p. 2</b>   |
| <b>Supplemental Table 1.</b>  | <b>p. 3-4</b> |
| <b>Supplemental Table 2.</b>  | <b>p. 5-7</b> |
| <b>Supplemental Table 3.</b>  | <b>p. 8</b>   |

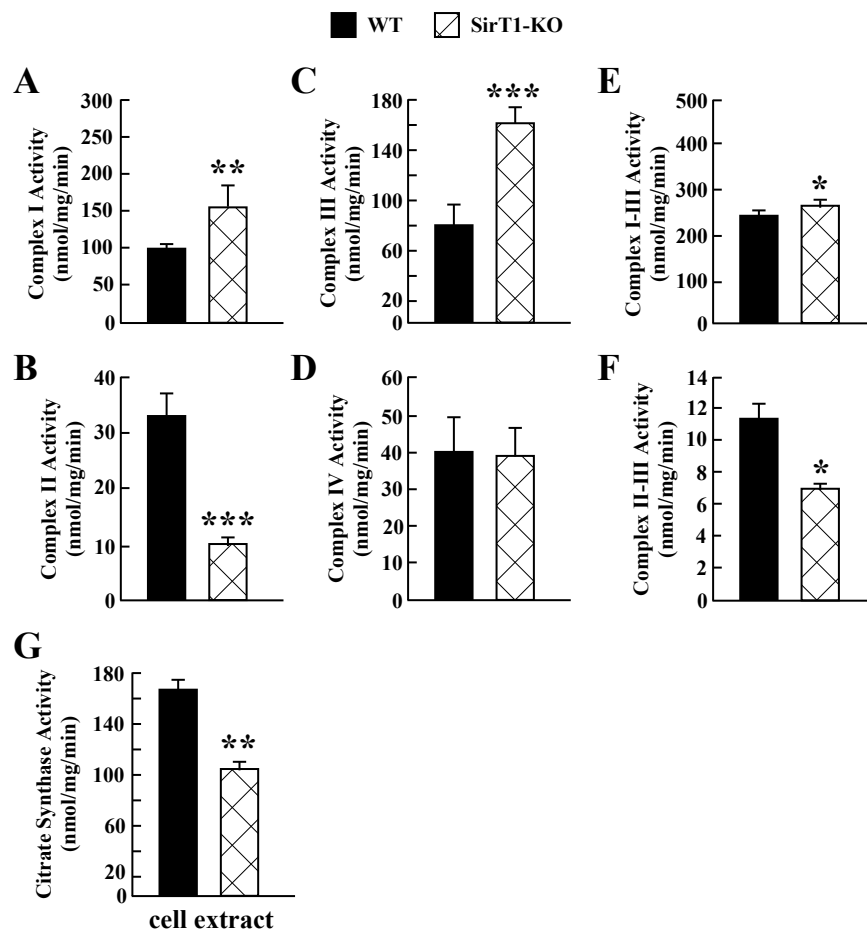

**Supplemental Figure 1. Effect of SirT1 deletion on mitochondrial enzyme activities in MEF cells.** Enzymatic activities of complex I (A), complex II (B), complex III (C), complex IV (D), complexes I+III (E), and complexes II+III (F) were measured in solubilized mitochondria from WT (filled bars) and SirT1-KO MEFs (hatched bars) as described in Fig. 4. Values are expressed in nmoles of substrate (donor or acceptor) consumed by min per min protein. Activities were NOT normalized with respect to mitochondrial citrate synthase activity. (G) Citrate synthase activity was measured in total cell lysates from WT and SirT1-null MEFs. The data represents the average  $\pm$  SD of 3 independent experiments. \*, \*\* and \*\*\*,  $P < 0.05$ ,  $0.01$ , and  $0.001$  vs. WT groups.

Supplemental Table 1. Microarray cDNA analysis of STAT family members in wild-type and SirT1-KO MEFS

| (avg int) | KI (fdr) | KU-W (fold chanç) | (mean)(SA (p) | KU-WU SYMBOL | (selector) | t (zratio) | KU ACCESSID | ARRAY_AI | AVG_Sign | CHROMO: | CYTOBAN | DEFINITIC | ENTREZ_I | GI       | ID      | ILMN_GE | OBSOLET   | ONTOLOC     | ONTOLOC      | ONTOLOC      | p(A)(SAMF | PROBE_C |
|-----------|----------|-------------------|---------------|--------------|------------|------------|-------------|----------|----------|----------|----------|----------|----------|----------|----------|----------|----------|---------|---------|-----------|----------|----------|---------|---------|-----------|-------------|--------------|--------------|-----------|---------|
| -0.43575  | 9.85E-07 | 1.75298           | 0.241191      | 2.23E-07     | Stat1      | 0          | 1.033758    | NM_00926 | 240725   | 393.1018 | 376.5621 | 293.5254 | 303.0482 | 234.2979 | 189.5606 | 263.3484 | 186.9552 | 1       | 1qC1.1  | Mus musci | 20846    | 1.14E+08 | 240725  | STAT1   |           | nucleus [g] | transcriptic | transcriptic | 0.000814  | +       |
| -0.45316  | 0.01132  | -1.30037          | 0.120122      | 0.004922     | Stat6      | 0          | -0.65174    | NM_00926 | 3940161  | 279.451  | 248.8082 | 161.0938 | 207.145  | 369.8577 | 298.7921 | 334.7062 | 313.2094 | 10      | 10qD3   | Mus musci | 20852    | 1.28E+08 | 3940161 | STAT6   |           | nucleus [g] | transcriptic | transcriptic | 0.031697  | +       |
| -0.88551  | 1.21E-14 | 2.056802          | -0.28518      | 1.33E-15     | Stat5a     | 0          | 1.311917    | NM_01148 | 4050619  | 243.3084 | 247.0932 | 164.4687 | 188.6333 | 123.469  | 93.03703 | 108.8393 | 117.6862 | 11      | 11qD    | Mus musci | 20850    | 31981473 | 4050619 | STAT5A  | STAT5; AA | nucleus [g] | signal tran: | positive re  | 0.000117  | +       |
| 0.185302  | 0        | 3.361813          | 0.815042      | 0            | Stat3      | 2          | 2.347927    | NM_21366 | 5310360  | 1225.926 | 1285.446 | 858.7106 | 982.2584 | 419.1821 | 301.969  | 371.9635 | 316.9784 | 11      | 11qD    | Mus musci | 20848    | 76253927 | 5310360 | STAT3   |           | nucleus [g] | transcriptic | eye photor   | 4.55E-06  | -       |
| -1.05902  | 0        | -1.17052          | -0.50301      | 0            | Stat2      | 0          | -0.43115    | NM_01996 | 6220594  | 110.5266 | 111.5686 | 95.62407 | 99.53232 | 154.0784 | 112.3134 | 147.6234 | 131.9094 | 10      | 10qD3   | Mus musci | 20847    | 9910571  | 6220594 | STAT2   | AW49648C  | nucleus [g] | transcriptic | transcriptic | 0.009674  | +       |
| -0.92678  | 0        | 2.028285          | -0.32808      | 0            | Stat3      | 0          | 1.29738     | NM_01148 | 6580553  | 219.7799 | 211.1154 | 157.0139 | 184.6821 | 104.0507 | 96.26723 | 118.3502 | 109.9755 | 11      | 11qD    | Mus musci | 20848    | 76253924 | 6580553 | STAT3   |           | nucleus [g] | transcriptic | eye photor   | 0.000156  | -       |
| 0.477273  | 0        | 4.084325          | 1.14989       | 0            | Stat3      | 2          | 2.730749    | NM_21366 | 6660176  | 2213.184 | 1847.356 | 1247.661 | 1541.955 | 515.2315 | 369.1342 | 567.7358 | 399.0903 | 11      | 11qD    | Mus musci | 20848    | 76253927 | 6660176 | STAT3   |           | nucleus [g] | transcriptic | eye photor   | 3.75E-05  | -       |
| -0.91643  | 0.00803  | 1.256681          | -0.29529      | 0.003364     | Stat5a     | 0          | 0.349435    | NM_01148 | 7650575  | 150.2919 | 137.4299 | 145.7191 | 149.489  | 164.3138 | 121.6045 | 143.1401 | 124.0753 | 11      | 11qD    | Mus musci | 20850    | 31981473 | 7650575 | STAT5A  | STAT5; AA | nucleus [g] | signal tran: | positive re  | 0.021837  | +       |

| PROBE_C  | PROBE_IL | PROBE_S | PROBE_S | PROBE_T | PROTEIN | REFSEQ_SEARCH_selector(A) | SOURCE   | SOURCE   | SPECIES | SYNONYM | TARGETIC | TRANSCR   | UNIGENE   | zscore_KC | zscore_KC | zscore_KC | zscore_KC | zscore_W1 | zscore_W1 | zscore_W1 | zscore_W1 | UT3      |          |
|----------|----------|---------|---------|---------|---------|---------------------------|----------|----------|---------|---------|----------|-----------|-----------|-----------|-----------|-----------|-----------|-----------|-----------|-----------|-----------|----------|----------|
| 52217485 | ILMN_265 | ACCCCGA | 3944    | S       |         | NP_03330                  | NM_00928 | ILMN_194 | 2       | RefSeq  | NM_00928 | Mus musci | AA408197  | STAT1     | ILMN_254  | 0.520581  | 0.530295  | 0.353845  | 0.351747  | -0.02549  | -0.00823  | 0.114347 | -0.12474 |
| 12709792 | ILMN_289 | GCTCTTA | 3687    | S       |         | NP_03331                  | NM_00928 | ILMN_209 | 2       | RefSeq  | NM_00928 | Mus musci |           | STAT6     | ILMN_209  | 0.238949  | 0.202543  | -0.16551  | 0.04841   | 0.334107  | 0.354825  | 0.310126 | 0.30351  |
| 10074604 | ILMN_297 | GTGCTAG | 3396    | S       |         | NP_03561                  | NM_01148 | ILMN_216 | 2       | RefSeq  | NM_01148 | Mus musci | STAT5; AA | STAT5A    | ILMN_216  | 0.124645  | 0.197072  | -0.14756  | -0.02623  | -0.53008  | -0.57608  | -0.60713 | -0.50888 |
| 10074966 | ILMN_258 | CGGGGT  | 2901    | S       |         | NP_99882                  | NM_21365 | ILMN_208 | 2       | RefSeq  | NM_21365 | Mus musci | AW10995   | STAT3     | ILMN_243  | 1.459282  | 1.501354  | 1.283059  | 1.2893    | 0.432714  | 0.363263  | 0.396303 | 0.313438 |
| 12772948 | ILMN_285 | ACTTGTG | 3973    | S       |         | NP_06434                  | NM_01996 | ILMN_215 | 2       | RefSeq  | NM_01996 | Mus musci | AW49648   | STAT2     | ILMN_215  | -0.52659  | -0.4318   | -0.61698  | -0.53593  | -0.35563  | -0.42584  | -0.35826 | -0.41419 |
| 10074903 | ILMN_309 | CCCTGCC | 3477    | A       |         | NP_03561                  | NM_01148 | ILMN_208 | 2       | RefSeq  | NM_01148 | Mus musci | AW10995   | STAT3     | ILMN_208  | 0.040708  | 0.072615  | -0.18771  | -0.0431   | -0.66486  | -0.54885  | -0.53872 | -0.56512 |
| 10074955 | ILMN_269 | CCTTGCT | 3006    | S       |         | NP_99882                  | NM_21365 | ILMN_208 | 2       | RefSeq  | NM_21365 | Mus musci | AW10995   | STAT3     | ILMN_243  | 1.946825  | 1.788176  | 1.606449  | 1.648828  | 0.595221  | 0.523502  | 0.741572 | 0.504618 |
| 10074614 | ILMN_297 | GGGTCTC | 3497    | S       |         | NP_03561                  | NM_01148 | ILMN_216 | 2       | RefSeq  | NM_01148 | Mus musci | STAT5; AA | STAT5A    | ILMN_216  | -0.27295  | -0.26691  | -0.25233  | -0.21165  | -0.30497  | -0.36243  | -0.38344 | -0.465   |

**Supplemental Table 2.** Phospho/non-Phospho Ratio change in untreated Sirt1-KO vs WT MEF cells

| Protein Name                             | Ratio | 95% CI       | Protein Name                             | Ratio | 95% CI      |
|------------------------------------------|-------|--------------|------------------------------------------|-------|-------------|
| Histone H3.1 (Phospho-Ser10)             | 23.24 | [9.47-37.00] | Tau (Phospho-Ser404)                     | 0.80  | [0.60-1.01] |
| LCK (Phospho-Tyr192)                     | 10.97 | [8.70-13.24] | Fos (Phospho-Thr232)                     | 0.80  | [0.64-0.97] |
| Dab1 (Phospho-Tyr232)                    | 9.72  | [8.46-10.97] | MEF2A (Phospho-Ser408)                   | 0.80  | [0.67-0.93] |
| SAPK/JNK (Phospho-Tyr185)                | 9.21  | [7.45-10.96] | c-Kit (Phospho-Tyr721)                   | 0.80  | [0.71-0.89] |
| LCK (Phospho-Ser59)                      | 8.14  | [6.70-9.57]  | ATF4 (Phospho-Ser245)                    | 0.80  | [0.37-1.23] |
| DAB1 (Phospho-Tyr220)                    | 7.76  | [6.67-8.85]  | Tau (Phospho-Ser396)                     | 0.80  | [0.66-0.93] |
| NFkB-p65 (Phospho-Ser529)                | 6.54  | [5.39-7.68]  | Mst1/Mst2 (Phospho-Thr183)               | 0.80  | [0.37-1.22] |
| JAK1 (Phospho-Tyr1022)                   | 5.74  | [3.97-7.51]  | PPAR-b (Phospho-Thr1457)                 | 0.79  | [0.54-1.04] |
| Tau (Phospho-Ser262)                     | 5.41  | [4.27-6.55]  | AKT2 (Phospho-Ser474)                    | 0.79  | [0.65-0.94] |
| CDC2 (Phospho-Tyr15)                     | 5.25  | [3.14-7.37]  | MAPKAPK-2 (Phospho-Thr222)               | 0.79  | [0.32-1.25] |
| Elk1 (Phospho-Thr417)                    | 5.25  | [3.50-7.00]  | eNOS (Phospho-Ser1177)                   | 0.78  | [0.50-1.07] |
| ASK1 (Phospho-Ser83)                     | 4.93  | [0.42-9.44]  | TIE2 (Phospho-Tyr1108)                   | 0.78  | [0.51-1.04] |
| AKT1 (Phospho-Ser124)                    | 4.64  | [2.12-7.15]  | Tyrosine Hydroxylase (TH) (Phospho-Ser8) | 0.77  | [0.54-1.00] |
| AURORA KINASE (Phospho-Thr288)           | 4.27  | [2.45-6.08]  | EGFR (Phospho-Tyr1110)                   | 0.76  | [0.48-1.04] |
| WEE1 (Phospho-Ser642)                    | 4.19  | [3.40-4.97]  | FKHRL1/FOXO3A (Phospho-Ser253)           | 0.75  | [0.48-1.02] |
| E2F1 (Phospho-Thr433)                    | 4.14  | [3.53-4.75]  | PLCg2 (Phospho-Tyr1217)                  | 0.75  | [0.55-0.96] |
| CK1-A/A2 (Phospho-Tyr294)                | 4.09  | [3.28-4.91]  | Myc (Phospho-Thr358)                     | 0.75  | [0.35-1.15] |
| NFkB-p65 (Phospho-Ser468)                | 4.03  | [3.04-5.03]  | Stathmin 1 (Phospho-Ser37)               | 0.75  | [0.35-1.16] |
| P38 MAPK (Phospho-Tyr182)                | 4.01  | [1.66-6.35]  | IKK-b (Phospho-Tyr199)                   | 0.74  | [0.49-1.00] |
| CDK7 (Phospho-Thr170)                    | 3.99  | [2.71-5.28]  | p53 (Phospho-Thr81)                      | 0.74  | [0.58-0.90] |
| HDAC6 (Phospho-Ser22)                    | 3.87  | [3.31-4.44]  | KIT (Phospho-Tyr703)                     | 0.74  | [0.54-0.94] |
| CD3Z (Phospho-Tyr142)                    | 3.80  | [2.46-5.14]  | CaMKII (Phospho-Thr286)                  | 0.74  | [0.50-0.98] |
| NFkB-p65 (Phospho-Ser536)                | 3.68  | [2.15-5.20]  | RyR2 (Phospho-Ser2808)                   | 0.73  | [0.53-0.94] |
| Smad2/3 (Phospho-Thr8)                   | 3.67  | [3.09-4.24]  | BCL-2 (Phospho-Ser70)                    | 0.73  | [0.64-0.83] |
| p44/42 MAP Kinase (Phospho-Tyr204)       | 3.64  | [2.70-4.58]  | Kv1.3/KCNA3 (Phospho-Tyr135)             | 0.73  | [0.53-0.93] |
| GATA1 (Phospho-Ser310)                   | 3.62  | [3.35-3.88]  | G3BP-1 (Phospho-Ser232)                  | 0.73  | [0.38-1.08] |
| Calmodulin (Phospho-Thr79/Ser81)         | 3.61  | [2.89-4.34]  | FAK (Phospho-Tyr861)                     | 0.73  | [0.49-0.97] |
| TYK2 (Phospho-Tyr1054)                   | 3.57  | [2.75-4.39]  | Tau (Phospho-Thr205)                     | 0.73  | [0.23-1.22] |
| IkB-a (Phospho-Ser32/36)                 | 3.52  | [2.70-4.34]  | eNOS (Phospho-Ser615)                    | 0.73  | [0.26-1.19] |
| SEK1/MKK4 (Phospho-Ser80)                | 3.35  | [2.23-4.46]  | MAPKAPK-2 (Phospho-Thr222)               | 0.73  | [0.50-0.95] |
| NFkB-p105/p50 (Phospho-Ser932)           | 3.28  | [1.27-5.30]  | MITF (Phospho-Ser73)                     | 0.72  | [0.30-1.14] |
| FOXO1A/3A (Phospho-Ser322/325)           | 3.28  | [2.79-3.78]  | MAP3K1/MEKK1 (Phospho-Thr1381)           | 0.72  | [0.14-1.29] |
| MKK3 (Phospho-Ser189)                    | 3.10  | [2.49-3.71]  | PTEN (Phospho-Ser370)                    | 0.72  | [0.25-1.19] |
| p27Kip1 (Phospho-Thr187)                 | 2.91  | [2.14-3.67]  | MYPT1 (Phospho-Thr-853)                  | 0.72  | [0.35-1.08] |
| Hsp90 co-chaperone Cdc37 (Phospho-Ser13) | 2.89  | [1.85-3.94]  | PLCg1 (Phospho-Tyr783)                   | 0.71  | [0.54-0.88] |
| IGF2R (Phospho-Ser2409)                  | 2.86  | [1.57-4.14]  | SEK1/MKK4/JNKK1 (Phospho-Ser257)         | 0.71  | [0.52-0.90] |
| IkB-a (Phospho-Tyr305)                   | 2.66  | [2.16-3.17]  | FGFR1 (Phospho-Tyr766)                   | 0.71  | [0.48-0.94] |
| CREB (Phospho-Ser129)                    | 2.64  | [2.26-3.03]  | CaMK2-b/g/d (Phospho-Thr287)             | 0.71  | [0.30-1.11] |
| BCR (Phospho-Tyr177)                     | 2.57  | [1.65-3.48]  | ACTIN Pan(a/b/g) (Phospho-Tyr55/53)      | 0.70  | [0.44-0.97] |
| CDK2 (Phospho-Thr160)                    | 2.52  | [2.02-3.02]  | SYN1-Synapsin1 (Phospho-Ser62)           | 0.70  | [0.23-1.17] |
| ETK (Phospho-Tyr566)                     | 2.46  | [0.84-4.07]  | PLCg1 (Phospho-Tyr1253)                  | 0.70  | [0.46-0.94] |
| P90RSK (Phospho-Ser380)                  | 2.44  | [2.09-2.79]  | P70S6K (Phospho-Ser424)                  | 0.70  | [0.57-0.83] |
| Trk B (Phospho-Tyr705)                   | 2.43  | [1.14-3.71]  | ATP1A1/Na+K+ ATPase1 (Phospho-Ser23)     | 0.70  | [0.30-1.10] |
| Caspase 9 (Phospho-Ser144)               | 2.40  | [2.07-2.74]  | A-RAF (Phospho-Tyr301/302)               | 0.70  | [0.33-1.07] |
| STAT1 (Phospho-Ser727)                   | 2.40  | [1.22-3.59]  | Catalase (Phospho-Tyr385)                | 0.70  | [0.47-0.92] |
| CDK1/CDC2 (Phospho-Thr14)                | 2.40  | [0.70-4.09]  | PKC z (Phospho-Thr560)                   | 0.69  | [0.03-1.35] |
| B-RAF (Phospho-Ser446)                   | 2.38  | [1.97-2.78]  | PKC e (Phospho-Ser729)                   | 0.69  | [0.58-0.80] |
| p53 (Phospho-Ser315)                     | 2.33  | [1.85-2.80]  | NFkB-p105/p50 (Phospho-Ser907)           | 0.69  | [0.55-0.83] |
| Src (Phospho-Ser75)                      | 2.33  | [1.20-3.45]  | VAV1 (Phospho-Tyr174)                    | 0.69  | [0.14-1.23] |

|                                         |      |             |                                                    |      |             |
|-----------------------------------------|------|-------------|----------------------------------------------------|------|-------------|
| SEK1/MKK4 (Phospho-Thr261)              | 2.32 | [1.69-2.95] | PI3-kinase p85-a (Phospho-Tyr607)                  | 0.68 | [0.37-1.00] |
| p27Kip1 (Phospho-Ser10)                 | 2.31 | [1.65-2.97] | Rb (Phospho-Ser811)                                | 0.68 | [0.52-0.85] |
| Elk1 (Phospho-Ser389)                   | 2.31 | [1.69-2.92] | GSK3a/b (Phospho-Tyr216/279)                       | 0.68 | [0.26-1.10] |
| IL-4R/CD124 (Phospho-Tyr497)            | 2.30 | [1.58-3.01] | MSK1 (Phospho-Ser376)                              | 0.68 | [0.31-1.05] |
| 4E-BP1 (Phospho-Thr70)                  | 2.29 | [1.43-3.15] | MSK1 (Phospho-Ser212)                              | 0.68 | [0.25-1.11] |
| Tyrosine Hydroxylase (Phospho-Ser19)    | 2.29 | [1.63-2.95] | PLCg1 (Phospho-Tyr771)                             | 0.68 | [0.19-1.16] |
| JAK2 (Phospho-Tyr221)                   | 2.28 | [1.87-2.69] | MYPT1 (Phospho-Thr696)                             | 0.68 | [0.28-1.07] |
| STAT5A (Phospho-Ser780)                 | 2.27 | [1.23-3.30] | Chk2 (Phospho-Thr383)                              | 0.68 | [0.50-0.86] |
| Chk1 (Phospho-Ser301)                   | 2.26 | [1.35-3.18] | MEK1 (Phospho-Ser298)                              | 0.68 | [0.28-1.08] |
| c-Jun (Phospho-Ser63)                   | 2.25 | [1.67-2.84] | ALK (Phospho-Tyr1604)                              | 0.66 | [0.31-1.01] |
| Catenin b (Phospho-Ser33)               | 2.25 | [2.01-2.50] | PLD1 (Phospho-Tyr561)                              | 0.66 | [0.45-0.87] |
| FKHR (Phospho-Ser319)                   | 2.22 | [1.72-2.72] | FLT3 (Phospho-Tyr969)                              | 0.66 | [0.39-0.92] |
| Survivin (Phospho-Thr117)               | 2.22 | [1.18-3.26] | LYN (Phospho-Tyr507)                               | 0.66 | [0.27-1.04] |
| P70S6K (Phospho-Ser418)                 | 2.20 | [1.76-2.65] | p130Cas (Phospho-Tyr410)                           | 0.65 | [0.52-0.77] |
| AurB (Phospho-Thr232)                   | 2.20 | [1.17-3.24] | KIT (Phospho-Tyr936)                               | 0.65 | [0.53-0.77] |
| PKD1/PKC mu (Phospho-Ser205)            | 2.17 | [1.30-3.03] | MEK1 (Phospho-Thr286)                              | 0.64 | [0.43-0.85] |
| Caspase-3 (Phospho-Ser150)              | 2.16 | [1.23-3.09] | HDAC2 (Phospho-Ser394)                             | 0.64 | [0.32-0.96] |
| PKD1/PKC m (Phospho-Tyr463)             | 2.14 | [1.40-2.88] | ATRIP (Phospho-Ser68/72)                           | 0.64 | [0.31-0.97] |
| JAK2 (Phospho-Tyr1007)                  | 2.12 | [1.61-2.64] | Smad1 (Phospho-Ser465)                             | 0.64 | [0.44-0.83] |
| IRS-1 (Phospho-Ser612)                  | 2.11 | [1.31-2.91] | ICAM-1 (Phospho-Tyr512)                            | 0.63 | [0.33-0.93] |
| VEGFR2 (Phospho-Tyr1059)                | 2.10 | [0.96-3.24] | Ezrin (Phospho-Tyr478)                             | 0.63 | [0.46-0.80] |
| MKP-1 (Phospho-Ser359)                  | 2.08 | [1.71-2.46] | PKC pan activation sites (Phospho)                 | 0.63 | [0.25-1.00] |
| HSP27 (Phospho-Ser15)                   | 2.01 | [1.57-2.46] | BAD (Phospho-Ser112)                               | 0.63 | [0.52-0.74] |
| CASP9 (Phospho-Thr125)                  | 2.00 | [1.25-2.75] | CREB (Phospho-Ser142)                              | 0.62 | [0.53-0.72] |
| Tau (Phospho-Thr231)                    | 2.00 | [1.59-2.41] | MEK1 (Phospho-Thr291)                              | 0.62 | [0.32-0.92] |
| IRS-1 (Phospho-Ser636)                  | 1.99 | [1.22-2.77] | GAP43 (Phospho-Ser41)                              | 0.62 | [0.16-1.08] |
| Caspase 9 (Phospho-Tyr153)              | 1.99 | [1.49-2.49] | HER2 (Phospho-Tyr1248)                             | 0.61 | [0.47-0.76] |
| HER3/ErbB3 (Phospho-Tyr1289)            | 1.97 | [1.74-2.19] | EGFR (Phospho-Thr678)                              | 0.61 | [0.39-0.83] |
| Catenin b (CTNNB) (Phospho-Tyr489)      | 1.96 | [1.63-2.29] | claudin 3 (Phospho-Tyr219)                         | 0.60 | [0.39-0.81] |
| HER4/ErbB4 (Phospho-Tyr1284)            | 1.93 | [1.51-2.35] | BAD (Phospho-Ser155)                               | 0.60 | [0.54-0.66] |
| Breast tumor kinase (Phospho-Tyr447)    | 1.93 | [1.34-2.51] | EPHB1/2 (Phospho-Tyr594/604)                       | 0.59 | [0.10-1.08] |
| Rac1/cdc42 (Phospho-Ser71)              | 1.92 | [1.35-2.49] | PP2A-a (Phospho-Tyr307)                            | 0.58 | [0.24-0.92] |
| LAT (Phospho-Tyr191)                    | 1.88 | [1.40-2.36] | p21Cip1 (Phospho-Thr145)                           | 0.57 | [0.33-0.81] |
| Src (Phospho-Tyr418)                    | 1.87 | [0.67-3.07] | Cyclin B1 (phospho-Ser126)                         | 0.57 | [0.40-0.74] |
| ASK1 (Phospho-Ser966)                   | 1.86 | [1.54-2.17] | EGFR (Phospho-Tyr1197)                             | 0.57 | [0.43-0.70] |
| LKB1 (Phospho-Thr189)                   | 1.86 | [1.41-2.30] | BCL-2 (Phospho-Thr69)                              | 0.57 | [0.48-0.65] |
| Smad3 (Phospho-Ser213)                  | 1.85 | [0.38-3.31] | FAK (Phospho-Tyr397)                               | 0.56 | [0.20-0.93] |
| STAT2 (Phospho-Tyr690)                  | 1.84 | [1.32-2.35] | Myc (Phospho-Thr58)                                | 0.56 | [0.41-0.71] |
| AMPK1/AMPK2 (Phospho-Ser485/491)        | 1.83 | [1.53-2.13] | CK1-A (Phospho-Thr321)                             | 0.54 | [0.47-0.61] |
| GATA1 (Phospho-Ser142)                  | 1.83 | [1.69-1.97] | PIP5K (Phospho-Ser307)                             | 0.53 | [0.27-0.79] |
| IkB-a (Phospho-Tyr42)                   | 1.82 | [1.29-2.35] | EGFR (Phospho-Thr693)                              | 0.53 | [0.40-0.66] |
| Estrogen Receptor-a (Phospho-Ser167)    | 1.82 | [1.43-2.21] | MSK1 (Phospho-Ser360)                              | 0.52 | [0.32-0.72] |
| CREB (Phospho-Ser121)                   | 1.81 | [1.55-2.08] | CREB (Phospho-Thr100)                              | 0.51 | [0.36-0.66] |
| CaMK4 (Phospho-Thr196/200)              | 1.80 | [1.53-2.07] | Tyrosine Hydroxylase (Phospho-Ser40)               | 0.51 | [0.33-0.68] |
| PKC z (Phospho-Thr410)                  | 1.80 | [1.59-2.01] | 14-3-3 z/d (Phospho-Thr232)                        | 0.51 | [0.10-0.91] |
| JunD (Phospho-Ser255)                   | 1.79 | [0.74-2.84] | Myc (Phospho-Ser373)                               | 0.49 | [0.37-0.60] |
| IRS-1 (Phospho-Ser323)                  | 1.76 | [1.39-2.13] | BAD (Phospho-Ser136)                               | 0.45 | [0.34-0.55] |
| Chk2 (Phospho-Ser516)                   | 1.76 | [1.21-2.30] | Connexin 43 (Phospho-Ser367)                       | 0.44 | [0.36-0.51] |
| HDAC4 (Phospho-Ser632)                  | 1.75 | [1.22-2.27] | PI3-kinase p85-subunit a/g (Phospho-Tyr467/Tyr199) | 0.41 | [0.29-0.52] |
| ERK3 (Phospho-Ser189)                   | 1.74 | [0.92-2.58] | MSK1 (Phospho-Thr581)                              | 0.40 | [0.19-0.62] |
| RSK1/2/3/4 (Phospho-Ser221/227/218/232) | 1.74 | [0.91-2.57] | p63(Phospho-Ser455)                                | 0.40 | [0.14-0.66] |
| 4E-BP1 (Phospho-Thr36)                  | 1.73 | [1.35-2.12] | eNOS (Phospho-Thr495)                              | 0.39 | [0.07-0.71] |

|                                 |      |             |                               |      |             |
|---------------------------------|------|-------------|-------------------------------|------|-------------|
| BTK (Phospho-Tyr222)            | 1.73 | [1.23-2.23] | Pyk2 (Phospho-Tyr579)         | 0.39 | [0.08-0.70] |
| SHP-2 (Phospho-Tyr580)          | 1.72 | [0.87-2.57] | Stathmin 1(Phospho-Ser24)     | 0.39 | [0.27-0.50] |
| FOXO1A (Phospho-Ser329)         | 1.72 | [1.63-1.81] | BRCA1 (Phospho-Ser1524)       | 0.38 | [0.31-0.46] |
| PAK1 (Phospho-Thr212)           | 1.71 | [1.55-1.88] | CD19 (Phospho-Tyr531)         | 0.38 | [0.29-0.47] |
| Zap-70 (Phospho-Tyr319)         | 1.70 | [1.00-2.39] | GABA-RB (Phospho-Ser434)      | 0.38 | [0.13-0.62] |
| Cyclin D3 (Phospho-Thr283)      | 1.68 | [1.20-2.16] | XIAP (Phospho-Ser87)          | 0.37 | [0.22-0.51] |
| MEK1 (Phospho-Ser217)           | 1.68 | [1.18-2.17] | Integrin b-3 (Phospho-Tyr773) | 0.33 | [0.20-0.47] |
| IL3R (Phospho-Tyr593)           | 1.66 | [0.88-2.44] | mTOR (Phospho-Ser2481)        | 0.33 | [0.22-0.44] |
| CASP1 (Phospho-Ser376)          | 1.64 | [0.90-2.39] | MEF2A (Phospho-Thr319)        | 0.32 | [0.22-0.42] |
| 4E-BP1 (Phospho-Ser65)          | 1.64 | [0.56-2.73] | NFkB-p65 (Phospho-Ser311)     | 0.30 | [0.28-0.33] |
| LCK (Phospho-Tyr504)            | 1.64 | [1.09-2.18] | CSFR (Phospho-Tyr561)         | 0.28 | [0.22-0.35] |
| Ezrin (Phospho-Tyr353)          | 1.64 | [1.16-2.12] | IRS-1 (Phospho-Ser307)        | 0.25 | [0.18-0.32] |
| Chk2 (Phospho-Thr387)           | 1.64 | [1.18-2.09] | DARPP-32 (Phospho-Thr75)      | 0.25 | [0.22-0.27] |
| Smad3 (Phospho-Thr179)          | 1.64 | [0.10-3.17] | PKD1/PKCm (Phospho-Ser910)    | 0.24 | [0.20-0.29] |
| c-met (Phospho-Tyr1003)         | 1.63 | [1.27-1.99] | LKB1 (Phospho-Ser428)         | 0.23 | [0.16-0.30] |
| IRS-1 (Phospho-Ser794)          | 1.63 | [1.09-2.17] | Raf1 (Phospho-Ser259)         | 0.15 | [0.08-0.23] |
| eEF2K (Phospho-Ser366)          | 1.62 | [1.26-1.99] | GAB1 (Phospho-Tyr659)         | 0.15 | [0.08-0.21] |
| IL-2RA/CD25 (Phospho-Ser268)    | 1.62 | [1.04-2.19] | BCL-XL (Phospho-Ser62)        | 0.09 | [0.08-0.10] |
| AMPKb1 (Phospho-Ser182)         | 1.62 | [0.94-2.30] | EEF2 (Phospho-Thr56)          | 0.08 | [0.06-0.09] |
| VE-Cadherin (Phospho-Tyr731)    | 1.61 | [0.79-2.43] | CrkL (Phospho-Tyr207)         | 0.00 | [0.00-0.00] |
| CaMK2 (Phospho-Thr305)          | 1.59 | [0.88-2.29] |                               |      |             |
| NMDAR2B (Phospho-Tyr1472)       | 1.58 | [0.90-2.25] |                               |      |             |
| BID (Phospho-Ser78)             | 1.58 | [0.63-2.52] |                               |      |             |
| Raf1 (Phospho-Ser338)           | 1.57 | [1.20-1.95] |                               |      |             |
| Catenin b (Phospho-Thr41/Ser45) | 1.57 | [1.38-1.77] |                               |      |             |
| HDAC5 (Phospho-Ser498)          | 1.57 | [1.27-1.87] |                               |      |             |
| Filamin A (Phospho-Ser2152)     | 1.57 | [0.98-2.16] |                               |      |             |
| HDAC3 (Phospho-Ser424)          | 1.57 | [1.29-1.85] |                               |      |             |
| Gab2 (Phospho-Tyr643)           | 1.56 | [1.15-1.98] |                               |      |             |
| Pyk2 (Phospho-Tyr580)           | 1.55 | [0.88-2.22] |                               |      |             |
| Pim-1 (Phospho-Tyr309)          | 1.54 | [0.68-2.40] |                               |      |             |
| Zap-70 (Phospho-Tyr493)         | 1.54 | [0.77-2.30] |                               |      |             |
| CD45 (Phospho-Ser1007)          | 1.54 | [0.93-2.14] |                               |      |             |
| MKP-1/2 (Phospho-Ser296)        | 1.52 | [1.08-1.96] |                               |      |             |
| P95/NBS1 (Phospho-Ser343)       | 1.52 | [0.87-2.16] |                               |      |             |
| Synuclein a (Phospho-Tyr125)    | 1.51 | [1.16-1.87] |                               |      |             |
| Cyclin B1 (phospho-Ser147)      | 1.51 | [0.98-2.03] |                               |      |             |

---

**Supplemental Table 3.** Induction of select target genes of NF- $\kappa$ B in Sirt1-null MEFs

---

| Acc #          | SYMBOL | mRNA                                                              | zratio<br>KO/WT |
|----------------|--------|-------------------------------------------------------------------|-----------------|
| NM_013599.2    | Mmp9   | matrix metalloproteinase 9                                        | <b>9.717</b>    |
| NM_008176.3    | Cxcl1  | chemokine (C-X-C motif) ligand 1                                  | <b>4.889</b>    |
| NM_011333.3    | Ccl2   | chemokine (C-C motif) ligand 2                                    | <b>4.168</b>    |
| NM_013653.3    | Ccl5   | chemokine (C-C motif) ligand 5                                    | <b>4.017</b>    |
| NM_011581.3    | Thbs2  | thrombospondin 2                                                  | <b>3.988</b>    |
| NM_001159396.1 | Irf1   | interferon regulatory factor 1                                    | <b>3.445</b>    |
| NM_011905.3    | Tlr2   | toll-like receptor 2                                              | <b>3.364</b>    |
| NM_010907.2    | Nfkbia | nuclear factor of kappa light polypeptide gene enhancer in B-cell | <b>3.346</b>    |
| NM_007554.2    | Bmp4   | bone morphogenetic protein 4                                      | <b>3.181</b>    |
| NM_011332.3    | Ccl17  | chemokine (C-C motif) ligand 17                                   | <b>3.052</b>    |
| NM_008706.5    | Nqo1   | NAD(P)H dehydrogenase, quinone 1                                  | <b>2.850</b>    |
| NM_009811.3    | Casp6  | caspase 6                                                         | <b>2.756</b>    |
| NM_001113529.1 | Csf1   | colony stimulating factor 1 (macrophage)                          | <b>2.541</b>    |
| NM_011693.3    | Vcam1  | vascular cell adhesion molecule 1                                 | <b>2.512</b>    |
| NM_011448.4    | Sox9   | SRY-box containing gene 9                                         | <b>2.496</b>    |
| NM_008416.2    | Junb   | Jun-B oncogene                                                    | <b>2.384</b>    |
| NM_008091.3    | Gata3  | GATA binding protein 3                                            | <b>2.290</b>    |
| NM_010442.2    | Hmox1  | heme oxygenase (decycling) 1                                      | <b>2.268</b>    |
| NM_007987.2    | Fas    | TNF receptor superfamily member 6 (Fas)                           | <b>2.200</b>    |
| NM_008873.3    | Plau   | plasminogen activator, urokinase                                  | <b>2.040</b>    |
| NM_019676.2    | Plcd1  | phospholipase C, delta 1                                          | <b>1.958</b>    |
| NM_013671.3    | Sod2   | superoxide dismutase 2, mitochondrial                             | <b>1.881</b>    |
| NM_010431.2    | Hif1a  | hypoxia inducible factor 1, alpha subunit                         | <b>1.717</b>    |
| NM_021274.1    | Cxcl10 | chemokine (C-X-C motif) ligand 10                                 | <b>1.691</b>    |
| NM_009506.2    | Vegfc  | vascular endothelial growth factor C                              | <b>1.557</b>    |
| NM_008690.3    | Nfkbie | nuclear factor of kappa light polypeptide gene enhancer in B-cell | <b>1.458</b>    |
| NM_009421.3    | Traf1  | TNF receptor-associated factor 1                                  | <b>1.359</b>    |

---
